# Supplementary material
Source: PubMed Central journal article supplement (PMC4662703)
Supplement: supp_WNL.0000000000002146_appendix_e-3_complete_search_strategy.pdf [file supp_WNL.0000000000002146_appendix_e-3_complete_search_strategy.pdf]

### Appendix e-3: Complete search strategy

#### *Ovid MEDLINE(R) In-Process & Other Non-Indexed Citations and Ovid MEDLINE(R)* 1946 to Present

| # | Searches                                                                                                                                                                                                                                                                                                                                                                                                                  | Results | Search Type |
|---|---------------------------------------------------------------------------------------------------------------------------------------------------------------------------------------------------------------------------------------------------------------------------------------------------------------------------------------------------------------------------------------------------------------------------|---------|-------------|
| 1 | multiple sclerosis/ or multiple sclerosis, chronic progressive/ or multiple sclerosis, relapsing-remitting/ or neuromyelitis optica/ or myelitis, transverse/                                                                                                                                                                                                                                                             | 41535   | Advanced    |
| 2 | ("multiple sclerosis" or "chronic progressive multiple sclerosis" or "chronic progressive MS" or "relapse-remitting multiple sclerosis" or "relapse-remitting MS" or "neuromyelitis optica" or "transverse myelitis").mp. [mp=title, abstract, original title, name of substance word, subject heading word, keyword heading word, protocol supplementary concept, rare disease supplementary concept, unique identifier] | 52220   | Advanced    |
| 3 | Demyelinating Diseases/ or myelitis/                                                                                                                                                                                                                                                                                                                                                                                      | 11563   | Advanced    |
| 4 | (devic*1 adj (disease or syndrome)).tw.                                                                                                                                                                                                                                                                                                                                                                                   | 234     | Advanced    |
| 5 | nmo.mp.                                                                                                                                                                                                                                                                                                                                                                                                                   | 857     | Advanced    |
| 6 | (N-methylmorpholine-N-oxide or molybdenum or N-methyl morpholine- N- oxide).mp. [mp=title, abstract, original title, name of substance word, subject heading word, keyword heading word, protocol supplementary concept, rare disease supplementary concept, unique identifier]                                                                                                                                           | 9433    | Advanced    |
| 7 | 5 not 6                                                                                                                                                                                                                                                                                                                                                                                                                   | 834     | Advanced    |
| 8 | *multiple sclerosis/ or *multiple sclerosis, chronic progressive/ or *multiple sclerosis, relapsing-remitting/ or *neuromyelitis optica/ or *myelitis, transverse/ or (multiple sclerosis/rh or multiple sclerosis, chronic progressive/rh or multiple sclerosis, relapsing-remitting/rh or neuromyelitis optica/rh or myelitis, transverse/rh) or 2 or 3 or 4 or 7                                                       | 61417   | Advanced    |

|    |                                                                                                                                                                                                                                                  |        |          |
|----|--------------------------------------------------------------------------------------------------------------------------------------------------------------------------------------------------------------------------------------------------|--------|----------|
| 9  | "loss of independence".mp. or disability evaluation/ or work capacity evaluation/                                                                                                                                                                | 36620  | Advanced |
| 10 | fatigue/                                                                                                                                                                                                                                         | 17548  | Advanced |
| 11 | ((pulmonary or respiratory) adj dysfunction).mp. [mp=title, abstract, original title, name of substance word, subject heading word, keyword heading word, protocol supplementary concept, rare disease supplementary concept, unique identifier] | 2449   | Advanced |
| 12 | deglutition disorders/ or adaptation, psychological/ or adaptation, physiological/ or cognitive therapy/                                                                                                                                         | 147805 | Advanced |
| 13 | "loss of swallowing".mp.                                                                                                                                                                                                                         | 19     | Advanced |
| 14 | respiratory insufficiency/ or airway obstruction/ or exp respiratory therapy/                                                                                                                                                                    | 113636 | Advanced |
| 15 | (reduced adj (nutrition or hydration)).mp. [mp=title, abstract, original title, name of substance word, subject heading word, keyword heading word, protocol supplementary concept, rare disease supplementary concept, unique identifier]       | 57     | Advanced |
| 16 | (decreased adj (nutrition or hydration)).mp. [mp=title, abstract, original title, name of substance word, subject heading word, keyword heading word, protocol supplementary concept, rare disease supplementary concept, unique identifier]     | 46     | Advanced |
| 17 | tremor/                                                                                                                                                                                                                                          | 7668   | Advanced |
| 18 | accidents/ or accidental falls/ or safety/                                                                                                                                                                                                       | 57162  | Advanced |
| 19 | muscle weakness/                                                                                                                                                                                                                                 | 4880   | Advanced |
| 20 | "loss of mobility".mp.                                                                                                                                                                                                                           | 291    | Advanced |
| 21 | activities of daily living/ or exp "rehabilitation of speech and language disorders"/ or quality of life/ or QOL.mp. [mp=title, abstract, original title, name of substance word, subject heading word, keyword heading                          | 153499 | Advanced |

|    |                                                                                                                                                                                                                                                                                                                                                                            |         |          |
|----|----------------------------------------------------------------------------------------------------------------------------------------------------------------------------------------------------------------------------------------------------------------------------------------------------------------------------------------------------------------------------|---------|----------|
|    | word, protocol supplementary concept, rare disease supplementary concept, unique identifier]                                                                                                                                                                                                                                                                               |         |          |
| 22 | exp sexual dysfunction, physiological/                                                                                                                                                                                                                                                                                                                                     | 22115   | Advanced |
| 23 | exp sexual dysfunction, psychological/                                                                                                                                                                                                                                                                                                                                     | 25835   | Advanced |
| 24 | "loss of intimacy".mp.                                                                                                                                                                                                                                                                                                                                                     | 13      | Advanced |
| 25 | employment/ or occupations/                                                                                                                                                                                                                                                                                                                                                | 49565   | Advanced |
| 26 | work/ or work schedule tolerance/                                                                                                                                                                                                                                                                                                                                          | 12450   | Advanced |
| 27 | "return to work".mp.                                                                                                                                                                                                                                                                                                                                                       | 5284    | Advanced |
| 28 | (social participation or social support* or support*).mp. or social work/ or interpersonal relations/ or exp social behavior/ [mp=title, abstract, original title, name of substance word, subject heading word, keyword heading word, protocol supplementary concept, rare disease supplementary concept, unique identifier]                                              | 7071171 | Advanced |
| 29 | adaptation, psychological/ or behavior/ or social adjustment/ or social distance/                                                                                                                                                                                                                                                                                          | 111694  | Advanced |
| 30 | exp recreation/ or exp sports/ or exp psychotherapy/ or energy metabolism/ or postural balance/ or balanc*.tw. or cooling*.mp. or physical fitness/ or physical endurance/ [mp=title, abstract, original title, name of substance word, subject heading word, keyword heading word, protocol supplementary concept, rare disease supplementary concept, unique identifier] | 513317  | Advanced |
| 31 | ataxia/ or gait ataxia/                                                                                                                                                                                                                                                                                                                                                    | 6388    | Advanced |
| 32 | "work hardening".mp.                                                                                                                                                                                                                                                                                                                                                       | 132     | Advanced |
| 33 | (independent living or fatigue or pain or choking or dysarthria or ataxia or tremor? or fall\$3 or weakness or sexual dysfunction or employment or vocation\$2 or work or impairment or diabilit\$3 or handicap? or avocational or recreation or leisure activit\$3).tw.                                                                                                   | 1277668 | Advanced |
| 34 | exp rehabilitation/                                                                                                                                                                                                                                                                                                                                                        | 137884  | Advanced |

|    |                                                                                                                                                                                                                                                                                                                      |          |          |
|----|----------------------------------------------------------------------------------------------------------------------------------------------------------------------------------------------------------------------------------------------------------------------------------------------------------------------|----------|----------|
| 35 | exp complementary therapies/<br><br>exp physical therapy modalities/ or "range of motion".mp. or<br>flexibil*.mp. or exercise therapy/ or stretch*.mp. or walking.mp. or<br>strengthen*.mp. or brace*.mp. or orthotic*.mp. or walker*.mp. or                                                                         | 164774   | Advanced |
| 36 | cane*1.mp. or crutch*2.mp. or vocational*.mp. [mp=title, abstract,<br>original title, name of substance word, subject heading word, keyword<br>heading word, protocol supplementary concept, rare disease<br>supplementary concept, unique identifier]<br><br>(complementary therap\$3 or complementary medicine? or | 343183   | Advanced |
| 37 | complementary medication? or alternative therap\$3 or alternative<br>medicine? or alternative medication?).mp.                                                                                                                                                                                                       | 20571    | Advanced |
| 38 | ("complementary and alternative medicine?" or "complementary and<br>alternative medication?" or "complementary and alternative<br>therap\$3").mp.                                                                                                                                                                    | 4285     | Advanced |
| 39 | "equipment and supplies"/                                                                                                                                                                                                                                                                                            | 17482    | Advanced |
| 40 | exp self-help devices/                                                                                                                                                                                                                                                                                               | 7861     | Advanced |
| 41 | rehabilitation nursing/                                                                                                                                                                                                                                                                                              | 1023     | Advanced |
| 42 | (rehabilitat\$3 or medication? or modalit\$3 or medical device? or<br>assistive technolog\$3 or assistive device? or therap\$3 or rehabilitation<br>nursing or memory or attention or concentration).mp.                                                                                                             | 3374805  | Advanced |
| 43 | or/9-42                                                                                                                                                                                                                                                                                                              | 10201434 | Advanced |
| 44 | epidemiologic methods/ or case-control studies/ or cohort studies/ or<br>longitudinal studies/ or follow-up studies/ or prospective studies/ or<br>meta-analysis/                                                                                                                                                    | 1085279  | Advanced |
| 45 | research/ or research design/                                                                                                                                                                                                                                                                                        | 238518   | Advanced |
| 46 | Statistics as Topic/                                                                                                                                                                                                                                                                                                 | 80107    | Advanced |
| 47 | case series.mp.                                                                                                                                                                                                                                                                                                      | 30276    | Advanced |
| 48 | "n=20".ab.                                                                                                                                                                                                                                                                                                           | 6905     | Advanced |

|    |                                                                                                                                                                                                                                                                                                                                                                          |         |          |
|----|--------------------------------------------------------------------------------------------------------------------------------------------------------------------------------------------------------------------------------------------------------------------------------------------------------------------------------------------------------------------------|---------|----------|
| 49 | 47 and 48                                                                                                                                                                                                                                                                                                                                                                | 18      | Advanced |
| 50 | (randomized controlled trial? or cohort: or case control: or review? or metaanalysis? or meta-analysis? or metanalysis?).mp.                                                                                                                                                                                                                                             | 2788264 | Advanced |
| 51 | or/44-46,49-50                                                                                                                                                                                                                                                                                                                                                           | 3757303 | Advanced |
| 52 | 8 and 43                                                                                                                                                                                                                                                                                                                                                                 | 36054   | Advanced |
| 53 | limit 52 to (clinical trial, all or clinical trial, phase i or clinical trial, phase ii or clinical trial, phase iii or clinical trial, phase iv or clinical trial or comparative study or controlled clinical trial or evaluation studies or meta analysis or multicenter study or randomized controlled trial or "review" or systematic reviews or validation studies) | 12436   | Advanced |
| 54 | 51 and 52                                                                                                                                                                                                                                                                                                                                                                | 12673   | Advanced |
| 55 | 53 or 54                                                                                                                                                                                                                                                                                                                                                                 | 16147   | Advanced |
| 56 | limit 55 to yr="2007 - 2013"                                                                                                                                                                                                                                                                                                                                             | 6723    | Advanced |
| 57 | (*multiple sclerosis/ or *multiple sclerosis, chronic progressive/ or *multiple sclerosis, relapsing-remitting/ or *neuromyelitis optica/ or *myelitis, transverse/) and 56                                                                                                                                                                                              | 4464    | Advanced |
| 58 | (*multiple sclerosis/rh, th or *multiple sclerosis, chronic progressive/rh, th or *multiple sclerosis, relapsing-remitting/rh, th or *neuromyelitis optica/rh, th or *myelitis, transverse/rh, th) and 57                                                                                                                                                                | 536     |          |

**Embase 1988 to 2013 Week 07**

| # | Searches                                                                                                                                                                                               | Results | Search Type |
|---|--------------------------------------------------------------------------------------------------------------------------------------------------------------------------------------------------------|---------|-------------|
| 1 | Multiple Sclerosis/ or Myelo optic Neuropathy/ or Myelitis/ (multiple sclerosis or chronic progressive MS or chronic progressive multiple sclerosis or relapse remitting multiple sclerosis or relapse | 61850   | Advanced    |
| 2 | remitting MS or neuromyelitis optica or devic disease or devic syndrome or devic?s disease or devic?s syndrome or transverse myelitis).tw.                                                             | 51805   | Advanced    |

|    |                                                                                                                                                                                              |        |          |
|----|----------------------------------------------------------------------------------------------------------------------------------------------------------------------------------------------|--------|----------|
| 3  | nmo.tw.                                                                                                                                                                                      | 1686   | Advanced |
| 4  | N-methylmorpholine N-oxide.mp.                                                                                                                                                               | 101    | Advanced |
| 5  | 3 not 4                                                                                                                                                                                      | 1665   | Advanced |
| 6  | or/1-2,5                                                                                                                                                                                     | 67571  | Advanced |
| 7  | "loss of independence".mp.                                                                                                                                                                   | 510    | Advanced |
| 8  | fatigue/ or exhaustion/ or lassitude/                                                                                                                                                        | 90543  | Advanced |
| 9  | pulmonary dysfunction.tw.                                                                                                                                                                    | 1617   | Advanced |
| 10 | exp respiratory failure/                                                                                                                                                                     | 43659  | Advanced |
| 11 | dysphagia/                                                                                                                                                                                   | 30358  | Advanced |
| 12 | airway obstruction/                                                                                                                                                                          | 18945  | Advanced |
| 13 | (decreased nutrition or decreased hydration).mp.                                                                                                                                             | 54     | Advanced |
| 14 | (reduced nutrition or reduced hydration).mp.                                                                                                                                                 | 65     | Advanced |
| 15 | dysarthria/                                                                                                                                                                                  | 7501   | Advanced |
| 16 | exp interpersonal communication/                                                                                                                                                             | 292418 | Advanced |
| 17 | ataxia/                                                                                                                                                                                      | 16714  | Advanced |
| 18 | muscle weakness.mp. or exp tremor/ [mp=title, abstract, subject headings, heading word, drug trade name, original title, device manufacturer, drug manufacturer, device trade name, keyword] | 54138  | Advanced |
| 19 | falling/                                                                                                                                                                                     | 21886  | Advanced |
| 20 | weakness/                                                                                                                                                                                    | 13048  | Advanced |
| 21 | "loss of mobility".mp.                                                                                                                                                                       | 347    | Advanced |
| 22 | patient mobility/                                                                                                                                                                            | 2600   | Advanced |
| 23 | daily life activity/                                                                                                                                                                         | 47381  | Advanced |
| 24 | exp sexual dysfunction/                                                                                                                                                                      | 48515  | Advanced |
| 25 | "loss of intimacy".mp.                                                                                                                                                                       | 18     | Advanced |
| 26 | vocation/ or exp employment/                                                                                                                                                                 | 38389  | Advanced |
| 27 | work/ or job accommodation/ or "quality of working life"/ or work capacity/ or workload/ or workplace/ or work schedule/                                                                     | 72241  | Advanced |
| 28 | work resumption/                                                                                                                                                                             | 2886   | Advanced |

|    |                                                                                                                                                                                                     |         |          |
|----|-----------------------------------------------------------------------------------------------------------------------------------------------------------------------------------------------------|---------|----------|
| 29 | work disability/ or adl disability/                                                                                                                                                                 | 4163    | Advanced |
| 30 | exp disability/                                                                                                                                                                                     | 80911   | Advanced |
| 31 | social behavior/ or social attitude/ or social interaction/ or social adaptation/ or social evolution/                                                                                              | 81673   | Advanced |
| 32 | exp recreation/                                                                                                                                                                                     | 28099   | Advanced |
| 33 | (independent adj living).mp.<br><br>(fatigue or respiratory dysfunction or pain or choking or "loss of swallowing" or Dysarthria or Ataxia or tremor\$1 or fall\$3 or                               | 2217    | Advanced |
| 34 | weakness or sexual dysfunction\$1 or employment or vocation\$2 or work or impairment or disabilit\$3 or handicap\$1 or avocational or recreation or leisure activit\$3 or social participation).mp. | 1874382 | Advanced |
| 35 | (work adj hardening).mp.                                                                                                                                                                            | 160     | Advanced |
| 36 | communication\$1.tw.                                                                                                                                                                                | 139459  | Advanced |
| 37 | exp rehabilitation/                                                                                                                                                                                 | 170953  | Advanced |
| 38 | exp alternative medicine/                                                                                                                                                                           | 30048   | Advanced |
| 39 | cryotherapy/ or hyperthermic therapy/                                                                                                                                                               | 19631   | Advanced |
| 40 | assistive technology/                                                                                                                                                                               | 600     | Advanced |
| 41 | rehabilitation nursing/<br><br>(rehabilitation or medication\$1 or therap\$3 or medical device\$1 or assistive technolog\$3 or modalit\$3 or rehabilitation nursing or                              | 940     | Advanced |
| 42 | compl?mentary therap\$3 or compl?mentary medic\$7 or alternative therap\$3 or alternative medic\$6 or "compl?mentary and alternative therap\$3" or "compl?mentary and alternative medic\$6").mp.    | 2322137 | Advanced |
| 43 | or/7-42<br><br>longitudinal study/ or prospective study/ or retrospective study/ or                                                                                                                 | 4247965 | Advanced |
| 44 | case control study/ or controlled clinical trial/ or meta analysis/ or randomized controlled trial/ or "systematic review"/                                                                         | 1102347 | Advanced |
| 45 | cohort analysis/                                                                                                                                                                                    | 139841  | Advanced |
| 46 | case study/                                                                                                                                                                                         | 16503   | Advanced |
| 47 | "n=20".ab.                                                                                                                                                                                          | 10266   | Advanced |
| 48 | 46 and 47                                                                                                                                                                                           | 18      | Advanced |

|    |                                                                                                                                                                                                                                                                         |         |          |
|----|-------------------------------------------------------------------------------------------------------------------------------------------------------------------------------------------------------------------------------------------------------------------------|---------|----------|
| 49 | review/                                                                                                                                                                                                                                                                 | 1740052 | Advanced |
| 50 | (random: or cohort: or case control: or review\$1 or metaanalys?s or meta analys?s or metanalys?s).mp.                                                                                                                                                                  | 3397105 | Advanced |
| 51 | or/44-45,48-50                                                                                                                                                                                                                                                          | 3838929 | Advanced |
| 52 | cognitive defect/ or cogniti*.mp.                                                                                                                                                                                                                                       | 310812  | Advanced |
| 53 | cold treatment/ or cooling/                                                                                                                                                                                                                                             | 9626    | Advanced |
| 54 | aerobic exercise/                                                                                                                                                                                                                                                       | 5003    | Advanced |
| 55 | assistive technology device/ or wheelchair/ or powered wheelchair/                                                                                                                                                                                                      | 5255    | Advanced |
| 56 | (conserv\$3 energy or energy efficiency or adaptive aid\$1 or pacing or cooling device\$1 or cooling or conditioning or aerobic conditioning or power wheelchair mobility or wheelchair\$1 or scooter\$1).tw.                                                           | 95285   | Advanced |
| 57 | psychotherapy/ or behavior therapy/                                                                                                                                                                                                                                     | 76591   | Advanced |
| 58 | group psychology/                                                                                                                                                                                                                                                       | 2468    | Advanced |
| 59 | support group/                                                                                                                                                                                                                                                          | 6312    | Advanced |
| 60 | pulmonary rehabilitation/                                                                                                                                                                                                                                               | 1950    | Advanced |
| 61 | intermittent mandatory ventilation/ or intermittent positive pressure ventilation/ or positive end expiratory pressure/                                                                                                                                                 | 27239   | Advanced |
| 62 | (respiratory rehabilitation or bipap or cpap).mp.                                                                                                                                                                                                                       | 7633    | Advanced |
| 63 | (inexuflator or positive pressure ventilation or intermittent ventilation).tw.                                                                                                                                                                                          | 4097    | Advanced |
| 64 | tracheostomy/                                                                                                                                                                                                                                                           | 11036   | Advanced |
| 65 | (tracheostomy or respiratory trainer\$1 or respiratory strengthening or inspiratory muscle strengthening exercise\$1 or expiratory muscle strengthening exercise\$1 or inspiratory strengthening exercise\$1 or expiratory strengthening exercise\$1 or quad cough).tw. | 8618    | Advanced |
| 66 | ice/                                                                                                                                                                                                                                                                    | 4042    | Advanced |
| 67 | heat treatment/                                                                                                                                                                                                                                                         | 6125    | Advanced |
| 68 | pain clinic/                                                                                                                                                                                                                                                            | 1759    | Advanced |
| 69 | cognitive therapy/                                                                                                                                                                                                                                                      | 29103   | Advanced |



|    |                                                                                                                                                                                                                                                                                                                                                                       |        |          |
|----|-----------------------------------------------------------------------------------------------------------------------------------------------------------------------------------------------------------------------------------------------------------------------------------------------------------------------------------------------------------------------|--------|----------|
| 70 | (pain adj management).mp.                                                                                                                                                                                                                                                                                                                                             | 16540  | Advanced |
| 71 | 69 and (68 or 70)                                                                                                                                                                                                                                                                                                                                                     | 443    | Advanced |
| 72 | (ice: or heat:).mp. [mp=title, abstract, subject headings, heading word, drug trade name, original title, device manufacturer, drug manufacturer, device trade name, keyword]                                                                                                                                                                                         | 231970 | Advanced |
| 73 | feeding apparatus/                                                                                                                                                                                                                                                                                                                                                    | 1997   | Advanced |
| 74 | gastrostomy/ or percutaneous endoscopic gastrostomy/                                                                                                                                                                                                                                                                                                                  | 8469   | Advanced |
| 75 | 6 and (73 or 74)                                                                                                                                                                                                                                                                                                                                                      | 42     | Advanced |
| 76 | athletic rehabilitation/ or bladder training/ or cognitive rehabilitation/ or community based rehabilitation/ or community reintegration/ or muscle training/ or occupational therapy/ or psychosocial rehabilitation/ or recreational therapy/ or sociotherapy/ or vocational rehabilitation/                                                                        | 22588  | Advanced |
| 77 | training/                                                                                                                                                                                                                                                                                                                                                             | 49611  | Advanced |
| 78 | exp exercise/                                                                                                                                                                                                                                                                                                                                                         | 151508 | Advanced |
| 79 | stretching/                                                                                                                                                                                                                                                                                                                                                           | 2515   | Advanced |
| 80 | "range of motion"/                                                                                                                                                                                                                                                                                                                                                    | 13074  | Advanced |
| 81 | brace/ or orthopedic shoe/ or walking aid/                                                                                                                                                                                                                                                                                                                            | 8041   | Advanced |
| 82 | orthotics/                                                                                                                                                                                                                                                                                                                                                            | 2569   | Advanced |
| 83 | treadmill exercise/                                                                                                                                                                                                                                                                                                                                                   | 10084  | Advanced |
| 84 | daily life activity/                                                                                                                                                                                                                                                                                                                                                  | 47381  | Advanced |
| 85 | exp hand function/                                                                                                                                                                                                                                                                                                                                                    | 22492  | Advanced |
| 86 | vocational education/                                                                                                                                                                                                                                                                                                                                                 | 5352   | Advanced |
| 87 | (physical therapy or physiotherapy or physical training or exercise or stretching or "range of motion" or strengthening or aerobic exercise\$1 or cooling garment\$1 or brace\$1 or orthotic\$1 or walking pole\$1 or "pole striding" or "pole walking" or walker\$1 or cane\$1 or crutch\$2 or functional stimulation or robotic training or treadmill training).tw. | 246343 | Advanced |
| 88 | ("activities of daily living" or "higher level activities of daily living" or "instrumental activities of daily living" or hand function or                                                                                                                                                                                                                           | 23350  | Advanced |

|     |                                                                                                                                                                                               |         |          |
|-----|-----------------------------------------------------------------------------------------------------------------------------------------------------------------------------------------------|---------|----------|
|     | vocational training or vocational rehabilitation or prevocational training or environmental control:).tw.                                                                                     |         |          |
| 89  | air conditioning/ or room ventilation/                                                                                                                                                        | 11034   | Advanced |
| 90  | splinting/                                                                                                                                                                                    | 2443    | Advanced |
| 91  | penis prosthesis/                                                                                                                                                                             | 2205    | Advanced |
| 92  | counseling/ or directive counseling/ or marital therapy/ or patient counseling/ or patient guidance/ or sexual counseling/                                                                    | 60048   | Advanced |
| 93  | (counsel* or sexual rehabilitation or erection device*1 or adaptive sexual aid?).tw.                                                                                                          | 70909   | Advanced |
| 94  | exp sport/                                                                                                                                                                                    | 70891   | Advanced |
| 95  | (avocational activit\$3 or kayaking or wheelchair athletic\$1 or adaptive leisure or adaptive biking or basketball).tw.                                                                       | 2250    | Advanced |
| 96  | social support/ or social work/                                                                                                                                                               | 60607   | Advanced |
| 97  | community care/ or community program/                                                                                                                                                         | 36385   | Advanced |
| 98  | (social work or family support: or caregiver support: or caregiver assessment or care partner\$1 support: or care partner\$1 support: or care partner\$1 assessment or social support\$1).tw. | 29820   | Advanced |
| 99  | "construction work and architectural phenomena"/ or architectural barrier/                                                                                                                    | 4398    | Advanced |
| 100 | (accessible transportation or accessible housing or accessible communit\$3 or accessible building\$1).tw.                                                                                     | 90      | Advanced |
| 101 | speech therapy.tw.                                                                                                                                                                            | 1565    | Advanced |
| 102 | (serial casting or resting splint\$1 or splint\$3 or heat modalit\$3 or cold modalit\$3 or heat therapy or cold treatment).tw.                                                                | 8530    | Advanced |
| 103 | or/52-68,71-72,75-102                                                                                                                                                                         | 1355644 | Advanced |
| 104 | 6 and 103                                                                                                                                                                                     | 7937    | Advanced |
| 105 | 6 and 43                                                                                                                                                                                      | 30938   | Advanced |
| 106 | *Multiple Sclerosis/ or *Myelo optic Neuropathy/ or *Myelitis/ or (Multiple Sclerosis/rh or Myelo optic Neuropathy/rh or Myelitis/rh)                                                         | 42078   | Advanced |
| 107 | 104 and 105 and 106                                                                                                                                                                           | 4529    | Advanced |

|     |                                                                                    |      |          |
|-----|------------------------------------------------------------------------------------|------|----------|
| 108 | 51 and 107                                                                         | 1798 | Advanced |
| 109 | limit 108 to (human and yr="2007 - 2013")                                          | 923  | Advanced |
|     | limit 109 to (book or book series or conference abstract or conference             |      |          |
| 110 | paper or conference proceeding or editorial or letter or note or short             | 158  | Advanced |
|     | survey or trade journal)                                                           |      |          |
| 111 | 109 not 110                                                                        | 765  | Advanced |
| 112 | 111 not (*Multiple Sclerosis/dt or *Myeloptoptic Neuropathy/dt or<br>*Myelitis/dt) | 547  | Advanced |

Cochrane CENTRAL – all duplicates

*CINAHL*

S3 S1 AND S2 (250) .

S2 random\* or systematic or study or studies or outcome\* (857,133) .

S1 (MM "Multiple Sclerosis/DH/PC/PF/RH/SS")

Limiters - Published Date from: 20070901-20131231; Peer Reviewed

*WOS*

526 #5 AND #4

Refined by: Languages=( ENGLISH ) AND Document Types=( ARTICLE ) AND  
Topic=(therap\* OR activit\* OR rehab\*)

Databases=SCI-EXPANDED Timespan=2007-09-01 - 2013-02-22 Select to combine sets.  
Select to delete this set.

# 7 951 #5 AND #4

Refined by: Languages=( ENGLISH ) AND Document Types=( ARTICLE )

Databases=SCI-EXPANDED Timespan=2007-09-01 - 2013-02-22 Select to combine sets.  
Select to delete this set.

# 6 1,004 #5 AND #4

Databases=SCI-EXPANDED Timespan=2007-09-01 - 2013-02-22 Edit Select to combine sets.  
Select to delete this set.

# 5 4,636 TI=("multiple sclerosis") AND TS=(rehab\* OR "physical therap\*" OR "physical  
activit\*" OR mobility OR work OR occupation\* OR physiother\* OR training OR stretch\* OR  
strength\* or exercise OR assistive OR recreation\* OR leisure or communicat\* OR social OR  
fatigue OR adl OR "activities of daily living" OR counsel\* OR employment OR unemployment  
OR retrain\* OR swallow\* OR fitness OR ambulat\* or impair\* or disabl\* OR disability OR  
"quality of life" OR qol OR community OR function\*OR "range of motion" OR step OR balance  
OR fall OR falls OR falling OR weakness OR orthotics OR brace OR orthoses OR mood OR  
"social participation" OR anxiety OR wheelchair\* OR pool OR hydrotherap\*)

Databases=SCI-EXPANDED Timespan=2007-09-01 - 2013-02-22
