# Supplementary material
Source: PubMed Central journal article supplement (PMC4662703)
Supplement: supp_WNL.0000000000002146_e-references_for_the_print_summary_article.pdf [file supp_WNL.0000000000002146_e-references_for_the_print_summary_article.pdf]

## E-REFERENCES

- e1. Romberg A, Virtanen A, Ruutiainen J. Long-term exercise improves functional impairment but not quality of life in multiple sclerosis. *J Neurol* 2005;252:839–845.
- e2. Surakka J, Romberg A, Ruutiainen J, et al. Effects of aerobic and strength exercise on motor fatigue in men and women with multiple sclerosis: a randomized controlled trial. *Clin Rehabil* 2004;18:737–746.
- e3. Petajan JH, Gappmaier E, White AT, Spencer MK, Mino L, Hicks RW. Impact of aerobic training on fitness and quality of life in multiple sclerosis. *Ann Neurol* 1996;39:432–441.
- e4. Mostert S, Kesselring J. Effects of a short-term exercise training program on aerobic fitness, fatigue, health perception and activity level of subjects with multiple sclerosis. *Mult Scler* 2002;8:161–168.
- e5. Schulz KH, Gold SM, Witte J, et al. Impact of aerobic training on immune endocrine parameters, neurotropic factors, quality of life and coordinative function in multiple sclerosis. *J Neurol Sci* 2004;225:11–18.
- e6. Learmonth YC, Paul L, Miller L, Mattison P, McFadyen AK. The effects of a 12-week leisure centre-based, group exercise intervention for people moderately affected with multiple sclerosis. *Clin Rehabil* 2011;26:579–593.
- e7. Mutluay FK, Tekeoglu A, Sebahattin S, et al. Group exercise training approach to multiple sclerosis. *Nobel Med* 2008;4:20–26.
- e8. Plow MA, Mathiowetz V, Lowe DA. Comparing individualized rehabilitation to a group wellness intervention for persons with multiple sclerosis. *Am J Health Promot* 2009;24:23–26.
- e9. Widener GL, Allen DD, Gibson-Horn C. Randomized clinical trial of balance-based torso weighting for improving upright mobility in people with multiple sclerosis. *Neurorehabil Neural Repair* 2009;23:784–791.
- e10. Podsiadlo D, Richardson S. The timed “Up & Go”: a test of basic functional mobility for frail elderly persons. *J Am Geriatr Soc* 1991;39:142–148.
- e11. Mutluay FK, Demir R, Ozyilmaz S, Caglar AT, Altintas A, Gurses HN. Breathing-enhanced upper extremity exercises for patients with multiple sclerosis. *Clin Rehabil* 2007;21:595–602.
- e12. Smeltzer SC, Lavietes MH, Troiano R, Cook SD. Testing of an index of pulmonary dysfunction in multiple sclerosis. *Nurs Res* 1989;38:370–374.
- e13. Borg GA. Psychophysical bases of perceived exertion. *Med Sci Sports Exerc* 1982;14:377–381.
- e14. Fry DK, Pfalzer LA, Chokshi AR, Wagner MT, Jackson ES. Randomized control trial of effects of a 10-week inspiratory muscle training program on measures of pulmonary function in persons with multiple sclerosis. *J Neurol Phys Ther* 2007;31:162–172.
- e15. Chiara T, Martin D, Sapienza C. Expiratory muscle strength training: speech production outcomes in patients with multiple sclerosis. *Neurorehabil Neural Repair* 2007;21:239–249.
- e16. Crippa A, Cardini R, Pellegatta D, Manzoni S, Cattaneo D, Marazzini F. Effects of sudden passive muscle shortening according to Grimaldi’s method on patients suffering from multiple sclerosis: a randomized controlled trial. *Neurorehabil Neural Repair* 2004;18:47–52.

- e17. Armutlu K, Karabudak R, Nurlu, G. Physiotherapy approaches in the treatment of ataxic multiple sclerosis: a pilot study. *Neurorehabil Neural Repair* 2001;15:203–211.
- e18. Johnson SK, Frederick J, Kaufman M, Mountjoy B. A controlled investigation of bodywork in multiple sclerosis. *J Altern Complement Med* 1999;5:237–243.
- e19. Collett J, Dawes H, Meaney A, Sackley C, et al. Exercise for multiple sclerosis: a single-blind randomized trial comparing three exercise intensities. *Mult Scler* 2011;17:594–603.
- e20. Broekmans T, Roelants M, Alders G, Feys P, Thijs H, Eijnde BO. Exploring the effects of a 20-week whole-body vibration training programme on leg muscle performance and function in persons with multiple sclerosis. *J Rehabil Med* 2010;42:866–872.
- e21. Kargarfard M, Etemadifar M, Baker P, Mehrabi M, Hayatbakhsh R. Effect of aquatic exercise training on fatigue and health-related quality of life in patients with multiple sclerosis. *Arch Phys Med Rehabil* 2012;93:1701–1708.
- e22. Dettmers C, Sulzmann M, Ruchay-Plössl A, Gütler R, Vieten M. Endurance exercise improves walking distance in MS patients with fatigue. *Acta Neurol Scand* 2009;120:251–257.
- e23. Mori F, Ljoka C, Magni E, et al. Transcranial magnetic stimulation primes the effects of exercise therapy in multiple sclerosis. *J Neurol* 2011;258:1281–1287.
- e24. Huijgen BC, Vollenbroek-Hutten MM, Zampolini M, et al. Feasibility of a home-based telerehabilitation system compared to usual care: arm/hand function in patients with stroke, traumatic brain injury and multiple sclerosis. *J Telemed Telecare* 2008;14:249–256.
- e25. Meyer-Heim A, Rothmaier M, Weder M, Kool J, Schenk P, Kesselring J. Advanced lightweight cooling-garment technology: functional improvements in thermosensitive patients with multiple sclerosis. *Mult Scler* 2007;13:232–237.
- e26. Schwid SR, Petrie MD, Murray R, et al. NASA/MS Cooling Study Group. A randomized controlled study of the acute and chronic effects of cooling therapy for MS. *Neurology* 2003;60:1955–1960.
- e27. Hugos CL, Copperman LF, Fuller BE, Yadav V, Lovera J, Bourdette DN. Clinical trial of a formal group fatigue program in multiple sclerosis. *Mult Scler* 2010;16:724–732.
- e28. Packer TL, Brink N, Sauriol A. *Managing fatigue: a six-week course for energy conservation*. Tucson, AZ: Therapy Skill Builders, 1995.
- e29. Mathiowetz V, Finlayson ML, Matuska KM, Chen HY, Luo P. Randomized controlled trial of an energy conservation course for persons with multiple sclerosis. *Mult Scler* 2005;11:592–601.
- e30. Mathiowetz VG, Matuska KM, Finlayson ML, et al. One-year follow-up to a randomized trial of an energy conservation course for persons with multiple sclerosis. *Int J Rehabil Res* 2007;30:305–313.
- e31. Ennis M, Thain J, Boggild M, et al. A randomized controlled trial of a health promotion education programme for people with multiple sclerosis. *Clin Rehabil* 2006;20:783-792.
