# Supplementary material
Source: PubMed Central journal article supplement (PMC4662703)
Supplement: supp_WNL.0000000000002146_Table_e-2_Therapies_with_evidence.pdf [file supp_WNL.0000000000002146_Table_e-2_Therapies_with_evidence.pdf]

**Table e-2. Rehabilitation therapies with sufficient evidence to support recommendations**

| <b>Intervention</b>                                                                          | <b>Number and class of study/studies</b>        | <b>MS type(s) studied</b>                                                                     | <b>Outcome</b>               | <b>Conclusion</b>    |
|----------------------------------------------------------------------------------------------|-------------------------------------------------|-----------------------------------------------------------------------------------------------|------------------------------|----------------------|
| Weekly home or outpatient PT x 8 weeks                                                       | 1 Class I study (Wiles 2001) <sup>e28</sup>     | MS type unspecified, participants able to walk $\geq 5$ m with or without an assistive device | Balance, disability and gait | Probably effective   |
| Weekly home or outpatient PT x 8 weeks                                                       | 1 Class I study (Wiles 2001) <sup>e28</sup>     | MS type unspecified, participants able to walk $\geq 5$ m with or without an assistive device | Upper-extremity dexterity    | Probably ineffective |
| Comprehensive multidisciplinary outpatient rehabilitation x 6 weeks                          | 1 Class II study (Patti 2003) <sup>e12</sup>    | SPMS, PPMS, EDSS 4.0–8.0                                                                      | Disability/function          | Possibly effective   |
| Individual inpatient rehabilitation x 3 weeks followed by home exercise program for 15 weeks | 1 Class II study (Solari 1999) <sup>e33</sup>   | RRMS, SPMS, PPMS, EDSS 3–6.5                                                                  | Disability                   | Possibly effective   |
| Breathing-enhanced upper-extremity exercises for 6 weeks                                     | 1 Class II study (Mutluay 2007) <sup>e77</sup>  | RRMS, PPMS, SPMS, mean EDSS 4.51 $\pm$ 1.55                                                   | Timed gait, FEV <sub>1</sub> | Possibly effective*  |
| Breathing-enhanced upper-extremity exercises for 6 weeks                                     | 1 Class II study (Mutluay 2007) <sup>e77</sup>  | RRMS, PPMS, SPMS, mean EDSS 4.51 $\pm$ 1.55                                                   | Disability                   | Possibly ineffective |
| Inspiratory muscle training for 10 weeks                                                     | 1 Class II study (Fry 2007) <sup>e79</sup>      | RRMS, PPMS, SPMS, EDSS 2–6.5                                                                  | PI <sub>max</sub>            | Possibly effective   |
| Motor and sensory balance training or                                                        | 1 Class II study (Catteneo 2007) <sup>e65</sup> | RRMS, SPMS, PPMS                                                                              | Static and dynamic balance   | Possibly effective   |

|                                    |                                                 |                  |                |                    |
|------------------------------------|-------------------------------------------------|------------------|----------------|--------------------|
| motor balance training for 3 weeks |                                                 |                  |                |                    |
| Motor balance training for 3 weeks | 1 Class II study (Catteneo 2007) <sup>e65</sup> | RRMS, SPMS, PPMS | Static balance | Possibly effective |

Abbreviations: EDSS = Expanded Disability Status Scale; FEV<sub>1</sub> = forced expiratory volume in 1 second; PI<sub>max</sub> = maximal inspiratory pressure; PPMS = primary progressive MS, RRMS = relapsing-remitting MS; SPMS = secondary progressive MS.

\*Clinical significance uncertain.

Note. Citations found in complete guideline, published as an online data supplement to the main article.
