# Supplementary material
Source: PubMed Central journal article supplement (PMC4662703)
Supplement: supp_WNL.0000000000002146_Table_e-3_Therapies_without_evidence_.pdf [file supp_WNL.0000000000002146_Table_e-3_Therapies_without_evidence_.pdf]

**Table e-3. Rehabilitation therapies without sufficient evidence to make recommendations**

| <b>Intervention</b>                                               | <b>Outcome(s) evaluated</b>                                             | <b>Evidence</b>                                                                                                                                                                     |
|-------------------------------------------------------------------|-------------------------------------------------------------------------|-------------------------------------------------------------------------------------------------------------------------------------------------------------------------------------|
| Comprehensive multidisciplinary outpatient rehabilitation         | self-efficacy, fatigue, depression, HRQL                                | 1 Class II study with insufficient precision (Kos 2007), <sup>e19</sup> 1 Class III study (Patti 2002) <sup>e11</sup>                                                               |
| Comprehensive multidisciplinary inpatient rehabilitation          | disability                                                              | 2 Class III studies looking at different populations and time frames (Freeman 1997, Khan 2008) <sup>e72,e24</sup>                                                                   |
| Inpatient rehabilitation                                          | fatigue                                                                 | 1 Class III study, data for control group not provided (Judica 2011) <sup>e27</sup>                                                                                                 |
| Weekly home or outpatient PT                                      | self-reported mobility/falls, depression, anxiety                       | 1 Class III study for patient-reported outcomes (Wiles 2001) <sup>e28</sup>                                                                                                         |
| Individualized inpatient exercise followed by home exercises      | HRQL                                                                    | 1 Class III study, patient-reported outcomes (Solari 1999) <sup>e33</sup>                                                                                                           |
| Motor and sensory training or motor balance training              | falls, subjective disability and handicap, confidence in balance skills | 1 Class II study, small number of falls in each treatment group, making interpretation difficult, and insufficient precision for subjective outcomes (Cattaneo 2007) <sup>e65</sup> |
| Home PT                                                           | QOL                                                                     | 1 Class III study with insufficient precision (Miller 2011) <sup>e37</sup>                                                                                                          |
| Outpatient exercise program combined with home exercises          | long-term beneficial effect on fatigue and QOL at 6 months              | 1 Class III study (McCullagh 2008) <sup>e34</sup>                                                                                                                                   |
| ACSM-based resistance training with or without electrostimulation | lower-extremity muscle strength, functional mobility, disability        | 1 Class III study (Broekmans 2011) <sup>e38</sup>                                                                                                                                   |

|                                                                                                    |                                                                                                                                                                                                                                |                                                                                                                                       |
|----------------------------------------------------------------------------------------------------|--------------------------------------------------------------------------------------------------------------------------------------------------------------------------------------------------------------------------------|---------------------------------------------------------------------------------------------------------------------------------------|
| Lower-extremity progressive resistance training                                                    | lower-extremity strength, function*; fatigue, mood, QOL**                                                                                                                                                                      | 1 Class III study (Dalgas 2009*), <sup>e43</sup> 1 Class III study (Dalgas 2010**) <sup>e45</sup>                                     |
| Progressive bicycle ergometry resistance training combined with balance exercises                  | gait, walking speed, functional reach, falls, fatigue, depression                                                                                                                                                              | 1 Class III study (Cakt 2010) <sup>e46</sup>                                                                                          |
| Three weeks of inpatient strength and aerobic training followed by a 23-week home exercise program | upper-extremity endurance, dexterity, lower-extremity strength, balance, walking speed, aerobic capacity, disability, fatigue, HRQL                                                                                            | 3 Class III studies using the same data set (Romberg 2004, Romberg 2005, Surakka 2004) <sup>e47-e49</sup>                             |
| Short-term (3–15 weeks) aerobic exercise programs                                                  | muscle strength, aerobic capacity, disability, health status, fatigue, mood†; lung function, fatigue, HRQL††; coordination, posture, self-efficacy, anxiety, depression†††                                                     | 3 Class III studies, different durations and study populations (†Petajan 1996, Mostert 2002††, Schulz 2004†††) <sup>e56,e60,e61</sup> |
| Robot-assisted gait training                                                                       | walking speed, knee extensor strength                                                                                                                                                                                          | 1 imprecise Class I study (Beer 2008) <sup>e64</sup>                                                                                  |
| Group exercise therapy                                                                             | activity, balance confidence, walking endurance, physical function, leg strength, fatigue, mood, goal attainment <sup>e70</sup> ; disability, walking speed, muscle strength, fatigue <sup>e73</sup> ; HRQL <sup>e70,e73</sup> | 2 Class III studies different durations and interventions (Learmonth 2011, Mutluay 2008) <sup>e70,e73</sup>                           |
| An individualized physical rehabilitation program, or group wellness intervention                  | fatigue, depression, QOL                                                                                                                                                                                                       | 1 Class III study (Plow 2009) <sup>e74</sup>                                                                                          |
| Breathing-enhanced upper-extremity exercises for 6 weeks                                           | pulmonary function parameters other than FEV <sub>1</sub> *, subjective feeling of exhaustion or respiratory dysfunction**                                                                                                     | 1 study, Class II lacking precision*, Class III for subjective outcomes** (Mutluay 2007) <sup>e77</sup>                               |
| Balance-based torso weighting                                                                      | mobility                                                                                                                                                                                                                       | 1 Class II study with inconsistent results on multiple measures (Widener 2009) <sup>e76</sup>                                         |

|                                                                                             |                                                                                                                    |                                                                                                                                            |
|---------------------------------------------------------------------------------------------|--------------------------------------------------------------------------------------------------------------------|--------------------------------------------------------------------------------------------------------------------------------------------|
| Inspiratory muscle training                                                                 | Multiple pulmonary function parameters, fatigue                                                                    | 1 study rated Class II for objective measures, with insufficient precision, and Class III for subjective measure (Fry 2007) <sup>e79</sup> |
| Expiratory muscle training                                                                  | expiratory muscle strength, voice/speech production                                                                | 1 Class III study (Chiara 2007) <sup>e80</sup>                                                                                             |
| Grimaldi's PT method                                                                        | hip abductor function, strength                                                                                    | 1 Class III study (Crippa 2004) <sup>e81</sup>                                                                                             |
| Johnstone pressure splints                                                                  | disability, coordination, equilibrium                                                                              | 1 Class III study (Armutlu 2001) <sup>e82</sup>                                                                                            |
| Feldenkrais bodywork therapy                                                                | dexterity, function, mood, self-efficacy, perceived stress                                                         | 1 Class III study (Johnson 1999) <sup>e83</sup>                                                                                            |
| The relative efficacy of 3 cycling-intensity protocols                                      | gait, fatigue, ADL, QOL                                                                                            | 1 Class III study (Collett 2011) <sup>e85</sup>                                                                                            |
| Whole-body vibration exercise protocol                                                      | leg muscle performance, functional capacity                                                                        | 1 Class III study (Broekmans 2010) <sup>e87</sup>                                                                                          |
| Aquatic exercise training                                                                   | fatigue, HRQL                                                                                                      | 1 Class III study (Kargarfard 2012) <sup>e88</sup>                                                                                         |
| Low-level cardiovascular endurance exercise                                                 | fatigue, endurance and walking speed, mood, QOL                                                                    | 1 Class III study (Dettmers 2009) <sup>e91</sup>                                                                                           |
| Intermittent transcranial magnetic theta burst stimulation with or without exercise therapy | spasticity, disability, fatigue, HRQL, ADL                                                                         | 1 Class III study (Mori 2011) <sup>e92</sup>                                                                                               |
| Home telerehabilitation program                                                             | manual dexterity, arm grasp                                                                                        | 1 Class III study (Huijgen 2008) <sup>e89</sup>                                                                                            |
| Short-term use of cooling garments                                                          | disability, fatigue, spasticity, pain, sweating, function, muscle strength, postural sway, bladder voiding control | 2 imprecise Class III studies (Schwid 2003, Meyer-Heim 2007) <sup>e95,e97</sup>                                                            |
| One-month use (1 hour/day) of cooling garments                                              | function, cognition, visual acuity, strength, fatigue                                                              | 1 Class III (Schwid 2003) <sup>e97</sup>                                                                                                   |
| Group fatigue program (Fatigue: Take Control Program)                                       | fatigue                                                                                                            | 1 Class III study (Hugos 2010) <sup>e100</sup>                                                                                             |
| Packer energy conservation program                                                          | fatigue, QOL, self-efficacy over 6 weeks <sup>^</sup> or 1 year <sup>^^</sup>                                      | 1 Class III study each (Mathieowitz 2005 <sup>^</sup> , Mathieowitz 2007 <sup>^^</sup> ) <sup>e102,e103</sup>                              |

|                                                          |                                                                |                                                |
|----------------------------------------------------------|----------------------------------------------------------------|------------------------------------------------|
| Outpatient health promotion education program (OPTIMISE) | engagement in health-promoting activities, self-efficacy, HRQL | 1 Class III study (Ennis 2006) <sup>e104</sup> |
|----------------------------------------------------------|----------------------------------------------------------------|------------------------------------------------|

Abbreviations: ACSM = American College of Sports Medicine; ADL = activities of daily living; HRQL = health-related quality of life; PT = physical therapy; QOL = quality of life.
